# Supplementary material for: USBombus, a database of contemporary survey data for North American Bumble Bees (Hymenoptera, Apidae, Bombus) distributed in the United States
Source: Biodivers Data J. 2015 Dec 30;(3):e6833. doi: 10.3897/BDJ.3.e6833 (PMC4698456; doi:10.3897/BDJ.3.e6833)
Supplement: Supplementary material 1 — Count of specimens of each bumble bee species in the western U.S.A. and Alaska [file biodiversity_data_journal-3-e6833-s001.csv]

Species	Count
Bombus spp.	10
Bombus appositus	260
Bombus balteatus	55
Bombus bifarius	2870
Bombus borealis	1
Bombus californicus	104
Bombus caliginosus	75
Bombus centralis	663
Bombus fernaldae	91
Bombus fervidus	162
Bombus flavifrons	910
Bombus griseocollis	2042
Bombus huntii	577
Bombus insularis	288
Bombus jonellus	72
Bombus melanopygus	278
Bombus mixtus	945
Bombus moderatus	39
Bombus morrisoni	25
Bombus nevadensis	108
Bombus occidentalis	415
Bombus perplexus	12
Bombus rufocinctus	395
Bombus sitkensis	203
Bombus suckleyi	19
Bombus sylvicola	199
Bombus vagans	19
Bombus vandykei	44
Bombus vosnesenskii	959
