# Supplementary material for: USBombus, a database of contemporary survey data for North American Bumble Bees (Hymenoptera, Apidae, Bombus) distributed in the United States
Source: Biodivers Data J. 2015 Dec 30;(3):e6833. doi: 10.3897/BDJ.3.e6833 (PMC4698456; doi:10.3897/BDJ.3.e6833)
Supplement: Supplementary material 2 — Count of specimens of each bumble bee species in the eastern U.S.A. [file biodiversity_data_journal-3-e6833-s002.csv]

Species	Count
Bombus affinis	22
Bombus auricomus	502
Bombus bimaculatus	1042
Bombus borealis	24
Bombus citrinus	11
Bombus fraternus	16
Bombus impatiens	3138
Bombus pensylvanicus	530
Bombus perplexus	57
Bombus sandersoni	1
Bombus ternarius	291
Bombus terricola	31
Bombus vagans	327
Bombus frigidus	98
